# Supplementary material for: A deep learning approach for automated scoring of the Rey–Osterrieth complex figure
Source: eLife. 2024 Nov 28;13:RP96017. doi: 10.7554/eLife.96017 (PMC11604216; doi:10.7554/eLife.96017)
Supplement: Figure 2—source data 1. — NA: non-augmented, DA: data augmentation is performed during training, TTA: test-time augmentation. The 95% confidence interval is shown in square brackets. [file elife-96017-fig2-data1.xlsx]

## Sheet: Sheet1
		MAE	MSE	R2
	Classifier TTA	1.259 [1.214, 1.308]	3.902 [3.598, 4.268]	0.963
	Classifier NA	1.228 [1.185, 1.275]	3.700 [3.418, 4.042]	0.965
	Regressor DA	1.162 [1.122, 1.204]	3.174 [2.958, 3.425]	0.97
	Classifier DA	1.161 [1.118, 1.206]	3.368 [3.105, 3.743]	0.968
	Regressor DA + TTA	1.152 [1.110, 1.194]	3.152 [2.928, 3.399]	0.97
	Classifier DA + TTA	1.149 [1.106, 1.194]	3.315 [3.061, 3.646]	0.969
	Regressor TTA	1.139 [1.099, 1.181]	3.074 [2.850, 3.335]	0.971
	Regressor NA	1.138 [1.098, 1.180]	3.078 [2.850, 3,354]	0.971
	Final Model	1.113 [1.074, 1.156]	3.000 [2.775, 3,262]	0.972
	(Best Regressor + Best Classifier)
