# Supplementary material for: A deep learning approach for automated scoring of the Rey–Osterrieth complex figure
Source: eLife. 2024 Nov 28;13:RP96017. doi: 10.7554/eLife.96017 (PMC11604216; doi:10.7554/eLife.96017)
Supplement: Figure 2—source data 2. — Mean absolute error (MAE), mean squared error (MSE), and R² are estimated directly from the estimated scores. [file elife-96017-fig2-data2.xlsx]

## Sheet: Sheet1
		MAE	MSE	R²		MAE	MSE	R²
	Item 1	0.104	0.095	0.8	Item 10	0.051	0.048	0.95
	Item 2	0.17	0.166	0.587	Item 11	0.081	0.072	0.853
	Item 3	0.148	0.151	0.778	Item 12	0.101	0.092	0.869
	Item 4	0.127	0.132	0.73	Item 13	0.116	0.107	0.778
	Item 5	0.125	0.132	0.744	Item 14	0.094	0.092	0.839
	Item 6	0.148	0.131	0.802	Item 15	0.073	0.09	0.899
	Item 7	0.063	0.073	0.923	Item 16	0.094	0.101	0.862
	Item 8	0.105	0.09	0.86	Item 17	0.091	0.078	0.869
	Item 9	0.091	0.084	0.893	Item 18	0.114	0.108	0.814
					Total score	1.113	3	0.972
