# Supplementary material for: A deep learning approach for automated scoring of the Rey–Osterrieth complex figure
Source: eLife. 2024 Nov 28;13:RP96017. doi: 10.7554/eLife.96017 (PMC11604216; doi:10.7554/eLife.96017)
Supplement: Figure 2—source data 3. — Mean absolute error (MAE), mean squared error (MSE), and R² are estimated directly from the estimated scores. [file elife-96017-fig2-data3.xlsx]

## Sheet: Sheet1
		MAE	MSE	R²		MAE	MSE	R²
	Item 1	0.118	0.108	0.8	Item 10	0.049	0.06	0.952
	Item 2	0.103	0.122	0.588	Item 11	0.081	0.07	0.848
	Item 3	0.132	0.126	0.81	Item 12	0.115	0.103	0.862
	Item 4	0.082	0.111	0.758	Item 13	0.077	0.078	0.808
	Item 5	0.084	0.121	0.761	Item 14	0.095	0.088	0.841
	Item 6	0.166	0.142	0.805	Item 15	0.08	0.083	0.925
	Item 7	0.07	0.083	0.932	Item 16	0.058	0.08	0.899
	Item 8	0.103	0.091	0.878	Item 17	0.082	0.069	0.9
	Item 9	0.077	0.074	0.917	Item 18	0.086	0.081	0.881
					Total score	1.131	3.319	0.969
