# Supplementary material for: A deep learning approach for automated scoring of the Rey–Osterrieth complex figure
Source: eLife. 2024 Nov 28;13:RP96017. doi: 10.7554/eLife.96017 (PMC11604216; doi:10.7554/eLife.96017)
Supplement: Figure 3—source data 1. — Thirty-seven intervals were evaluated, across the whole range of scores. We evaluated mean absolute error (MAE) and mean squared error (MSE) for the total score within each interval. [file elife-96017-fig3-data1.xlsx]

## Sheet: Sheet1
	Score Interval	MSE	MAE	Score Interval	MSE	MAE	Score Interval	MSE	MAE	Score Interval	MSE	MAE
	(0 - 0.5)	3.72	1.52	(10 - 10.5)	5.52	1.79	(19 - 19.5)	3.07	1.25	(28 - 28.5)	3.28	1.27
	(n=22)			(n=104)			(n=42)			(n=130)
	(1 - 1.5)	2.78	1.17	(11 - 11.5)	3.17	1.41	(20 - 20.5)	4.9	1.56	(29 - 29.5)	3.11	1.28
	(n=15)			(n=33)			(n=131)			(n=92)
	(2 - 2.5)	3.15	1.41	(12 - 12.5)	5.77	1.74	(21 - 21.5)	4.41	1.3	(30 - 30.5)	3.26	1.28
	(n=52)			(n=103)			(n=45)			(n=155)
	(3 - 3.5)	3.93	1.52	(13 - 13.5)	2.77	1.36	(22 - 22.5)	3.75	1.44	(31 - 31.5)	3.33	1.38
	(n=26)			(n=28)			(n=105)			(n=134)
	(4 - 4.5)	3.66	1.52	(14 - 14.5)	4.82	1.56	(23 - 23.5)	3.26	1.05	(32 - 32.5)	2.67	1.15
	(n=62)			(n=108)			(n=75)			(n=167)
	(5 - 5.5)	7.23	2.09	(15 - 15.5)	3.7	1.52	(24 - 24.5)	3.43	1.25	(33 - 33.5)	1.73	0.96
	(n=32)			(n=48)			(n=120)			(n=196)
	(6 - 6.5)	5.27	1.61	(16 - 16.5)	5.17	1.51	(25 - 25.5)	2.45	1.03	(34 - 34.5)	1.21	0.77
	(n=92)			(n=141)			(n=75)			(n=299)
	(7 - 7.5)	6.96	1.74	(17 - 17.5)	4.4	1.56	(26 - 26.5)	4.32	1.44	(35 - 35.5)	0.88	0.58
	(n=21)			(n=54)			(n=149)			(n=295)
	(8 - 8.5)	4.79	1.52	(18 - 18.5)	6.03	1.51	(27 - 27.5)	2.82	1.11	-36	0.45	0.2
	(n=88)			(n=115)			(n=93)			(n=564)
	(9 - 9.5)	2.21	1.13
	(n=34)
