# Supplementary material for: A deep learning approach for automated scoring of the Rey–Osterrieth complex figure
Source: eLife. 2024 Nov 28;13:RP96017. doi: 10.7554/eLife.96017 (PMC11604216; doi:10.7554/eLife.96017)
Supplement: Figure 3—source data 2. — Thirty-seven intervals were evaluated, across the whole range of scores. We evaluated mean absolute error (MAE) and mean squared error (MSE) for the total score within each interval. [file elife-96017-fig3-data2.xlsx]

## Sheet: Sheet1
	Score Interval	MSE	MAE	Score Interval	MSE	MAE	Score Interval	MSE	MAE	Score Interval	MSE	MAE
	(0 - 0.5)	14.83	3.33	(10 - 10.5)	5.81	1.84	(19 - 19.5)	2.77	1.21	(28 - 28.5)	3.96	1.36
	(n=3)			(n=35)			(n=21)			(n=138)
	(1 - 1.5)	9.55	2.06	(11 - 11.5)	3.96	1.49	(20 - 20.5)	5.96	1.7	(29 - 29.5)	4.45	1.54
	(n=4)			(n=23)			(n=58)			(n=61)
	(2 - 2.5)	7.79	2.29	(12 - 12.5)	6.2	2.03	(21 - 21.5)	5.08	1.63	(30 - 30.5)	3.28	1.31
	(n=7)			(n=39)			(n=30)			(n=136)
	(3 - 3.5)	4.09	1.85	(13 - 13.5)	5.09	1.5	(22 - 22.5)	5.29	1.65	(31 - 31.5)	3.45	1.46
	(n=5)			(n=16)			(n=79)			(n=53)
	(4 - 4.5)	9.3	2.11	(14 - 14.5)	6.74	1.74	(23 - 23.5)	3.49	1.24	(32 - 32.5)	3.14	1.33
	(n=20)			(n=34)			(n=37)			(n=133)
	(5 - 5.5)	14.76	2.88	(15 - 15.5)	5.66	1.68	(24 - 24.5)	5.55	1.73	(33 - 33.5)	2.27	1.13
	(n=6)			(n=22)			(n=97)			(n=93)
	(6 - 6.5)	7.24	1.99	(16 - 16.5)	5.77	1.65	(25 - 25.5)	4.23	1.53	(34 - 34.5)	1.75	1.02
	(n=18)			(n=41)			(n=58)			(n=243)
	(7 - 7.5)	14.88	3	(17 - 17.5)	8.1	2.07	(26 - 26.5)	2.72	1.29	(35 - 35.5)	1.85	0.67
	(n=8)			(n=14)			(n=94)			(n=204)
	(8 - 8.5)	7.35	1.96	(18 - 18.5)	3.32	1.45	(27 - 27.5)	5.34	1.59	-36	1.03	0.19
	(n=31)			(n=50)			(n=55)			(n=519)
	(9 - 9.5)	3.79	1.32
	(n=10)
